# Supplementary material for: Speckle Tracking Derived Contractile Reserve and Microvascular Functions in Ischaemia with No Obstructive Coronary Artery Disease – A Pilot Study.
Source: Research Square preprint supplement (doi:10.21203/rs.3.rs-1300678/v1), 2022-03-30
Supplement: Supplementary file 1 [file fded1248a821797204f9a551.docx]

Appendix – Results

**Study Overview**

Angina with clinically indicated coronary angiography referred to the study by treating Cardiologists

(n=42)

Enrollment – Informed consent before elective admission for coronary angiography

(n=42)

Obstructive CADon coronary angiography

(n=2)

No obstructive CAD on coronary angiography and diagnosis of coronary vasomotor disorders

(n=40)

Echocardiography Assessment (n=40)

- Global Longitudinal Strain (GLS) derived contractile reserve (CR) with low dose dobutamine stress echocardiography

Excluded (n=10)

- Withdrew DSE consent (n=2)
- Lost to follow-up (n=3)
- Poor image quality (n=5)

Correlation study with coronary flow reserve and coronary microvascular resistance

(n=30)
